# Supplementary material for: Expression profiling of tomato pre-abscission pedicels provides insights into abscission zone properties including competence to respond to abscission signals
Source: PubMed Central journal article supplement (PMC3600680; doi:10.1186/1471-2229-13-40), 2013-03-09

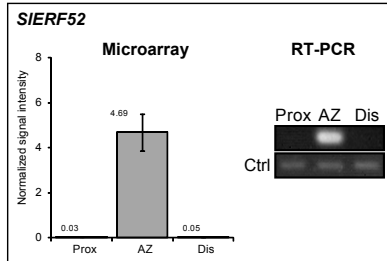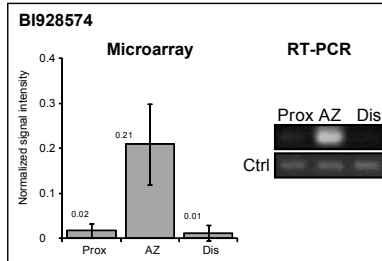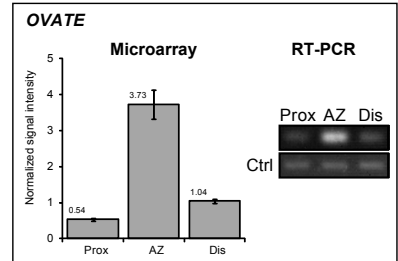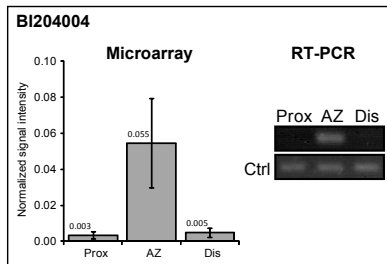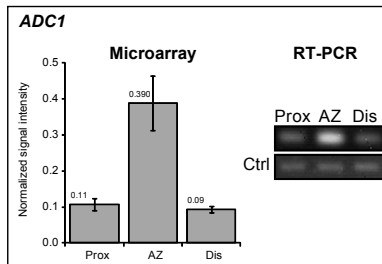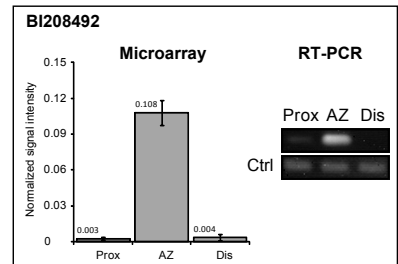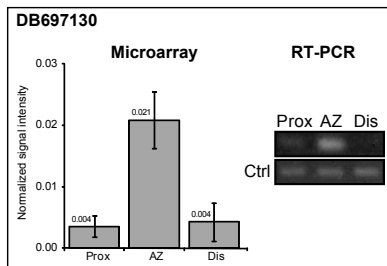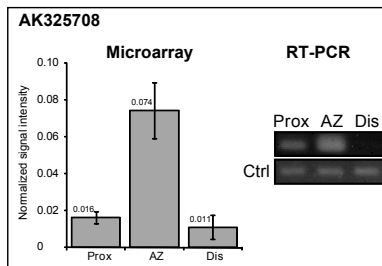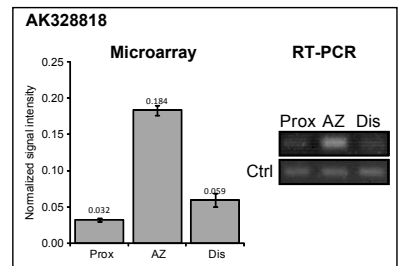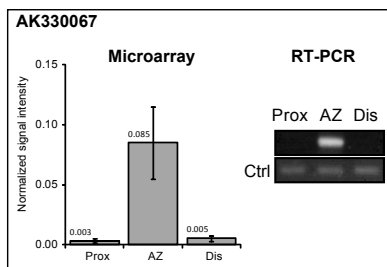

Supplement: 1471-2229-13-40-S3.pdf [file 1471-2229-13-40-S3.pdf]
